# Supplementary material for: DAF-16/FoxO Directly Regulates an Atypical AMP-Activated Protein Kinase Gamma Isoform to Mediate the Effects of Insulin/IGF-1 Signaling on Aging in Caenorhabditis elegans
Source: PubMed Central journal article supplement (PMC3916255; doi:10.1371/journal.pgen.1004109), 2014-02-06
Supplement: pgen.1004109.s014.pdf [file pgen.1004109.s014.pdf]

**Figure S14**

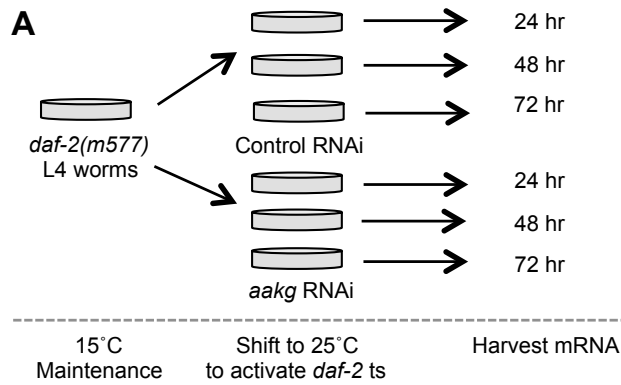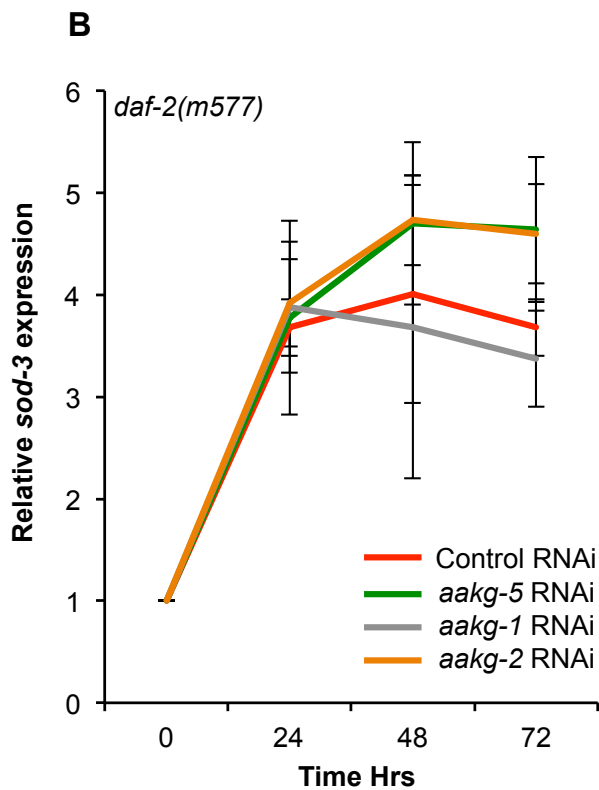

**C**

| RNAi treatment | Number of trials | <i>p</i> value vs 24 Hrs | Number of trials | <i>p</i> value vs 48 Hrs | Number of trials | <i>p</i> value vs 72 Hrs |
|----------------|------------------|--------------------------|------------------|--------------------------|------------------|--------------------------|
| control        | 3                | NA                       | 3                | NA                       | 3                | NA                       |
| <i>aakg-1</i>  | 3                | 0.55                     | 3                | 0.59                     | 3                | 0.01                     |
| <i>aakg-2</i>  | 3                | 0.40                     | 3                | 0.05                     | 3                | 0.35                     |
| <i>aakg-4</i>  | 6                | 0.02                     | 6                | 0.43                     | 3                | 0.95                     |
| <i>aakg-5</i>  | 6                | 0.09                     | 6                | 0.39                     | 3                | 0.81                     |
