# Supplementary material for: DAF-16/FoxO Directly Regulates an Atypical AMP-Activated Protein Kinase Gamma Isoform to Mediate the Effects of Insulin/IGF-1 Signaling on Aging in Caenorhabditis elegans
Source: PubMed Central journal article supplement (PMC3916255; doi:10.1371/journal.pgen.1004109), 2014-02-06

Figure S15

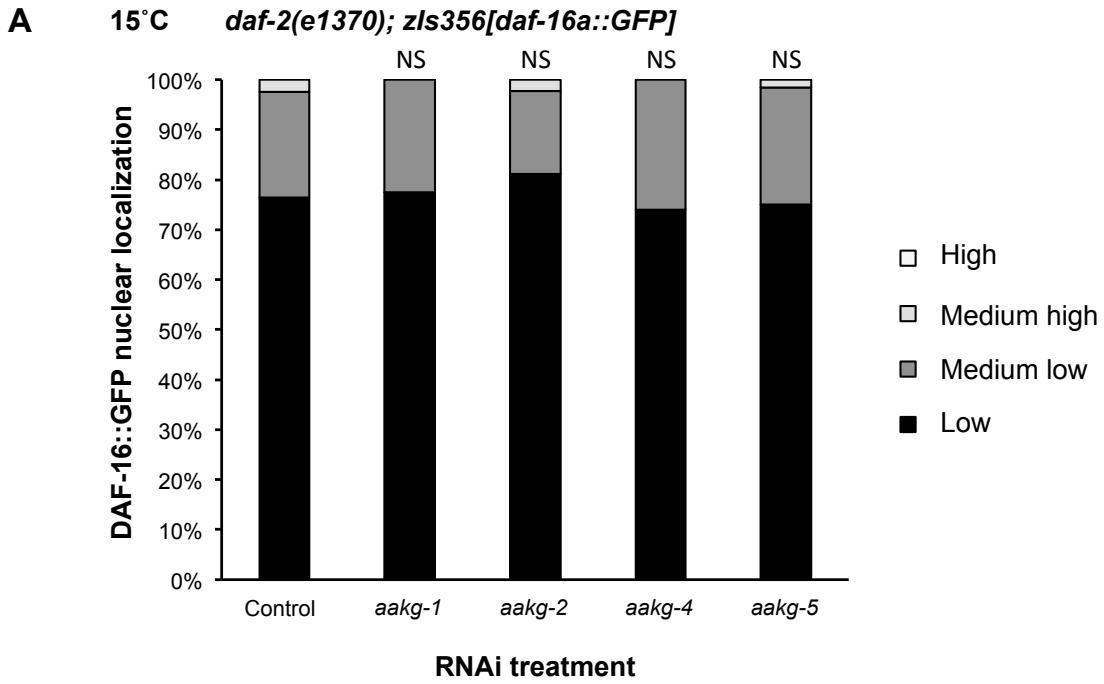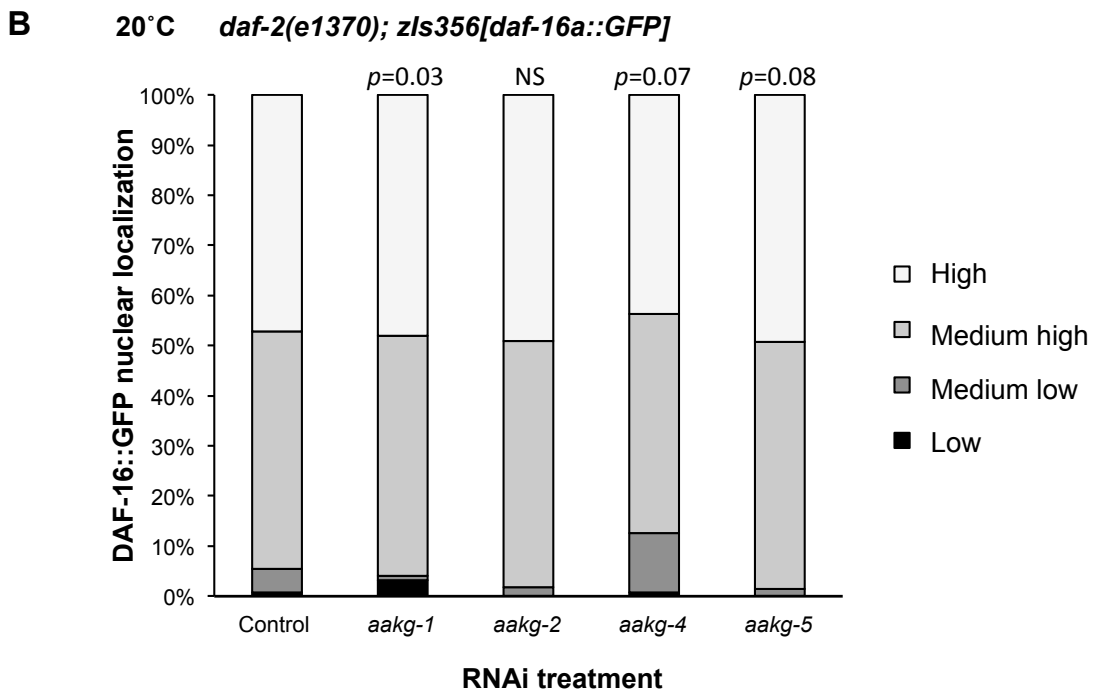

Supplement: pgen.1004109.s015.pdf [file pgen.1004109.s015.pdf]
