# Supplementary material for: DAF-16/FoxO Directly Regulates an Atypical AMP-Activated Protein Kinase Gamma Isoform to Mediate the Effects of Insulin/IGF-1 Signaling on Aging in Caenorhabditis elegans
Source: PubMed Central journal article supplement (PMC3916255; doi:10.1371/journal.pgen.1004109), 2014-02-06
Supplement: pgen.1004109.s017.pdf [file pgen.1004109.s017.pdf]

| Gene          | CBS Domain |     |     |     |
|---------------|------------|-----|-----|-----|
|               | 1          | 2   | 3   | 4   |
| <i>aakg-1</i> | 65%        | 66% | 70% | 74% |
| <i>aakg-2</i> | 56%        | 70% | 60% | 64% |
| <i>aakg-3</i> | 62%        | 60% | 51% | 71% |
| <i>aakg-4</i> | 10%        | 50% | 43% | 48% |
| <i>aakg-5</i> | 12%        | 52% | 57% | 50% |

**Table S1. Percentage amino acid sequence similarity of *C. elegans* AMPK  $\gamma$  subunit CBS domains to human PRKAG1.**
