# Supplementary material for: DAF-16/FoxO Directly Regulates an Atypical AMP-Activated Protein Kinase Gamma Isoform to Mediate the Effects of Insulin/IGF-1 Signaling on Aging in Caenorhabditis elegans
Source: PubMed Central journal article supplement (PMC3916255; doi:10.1371/journal.pgen.1004109), 2014-02-06
Supplement: pgen.1004109.s018.pdf [file pgen.1004109.s018.pdf]

| Species and gene                   | Residue<br>(Human <i>PRKAG1</i> numbering) |     |     |     |     |
|------------------------------------|--------------------------------------------|-----|-----|-----|-----|
|                                    | 70                                         | 150 | 151 | 298 | 299 |
| Human <i>PRKAG1</i>                | R                                          | H   | R   | H   | R   |
| <i>C. elegans aakg-1</i>           | R                                          | H   | R   | H   | R   |
| <i>C. elegans aakg-2</i>           | R                                          | H   | R   | H   | R   |
| <i>C. elegans aakg-3</i>           | R                                          | H   | R   | H   | R   |
| <i>C. elegans aakg-4</i>           | I                                          | S   | F   | S   | S   |
| <i>C. elegans aakg-5</i>           | T                                          | H   | R   | Q   | S   |
| <i>C. briggsae aakg-1</i> CBG11682 | R                                          | H   | R   | H   | R   |
| <i>C. briggsae aakg-2</i>          | R                                          | H   | R   | H   | R   |
| <i>C. briggsae aakg-3</i>          | R                                          | H   | R   | H   | R   |
| <i>C. briggsae aakg-4</i>          | I                                          | S   | F   | C   | C   |
| <i>C. briggsae aakg-5</i>          | T                                          | H   | R   | Q   | S   |
| <i>C. remanei CRE19909</i>         | R                                          | H   | R   | H   | R   |
| <i>C. remanei aakg-2</i>           | R                                          | H   | R   | H   | R   |
| <i>C. remanei aakg-3</i>           | R                                          | H   | R   | H   | R   |
| <i>C. remanei aakg-4</i>           | I                                          | S   | F   | S   | C   |
| <i>C. remanei aakg-5</i>           | T                                          | H   | R   | Q   | S   |
| <i>C. remanei CRE19910</i>         | -                                          | -   | -   | -   | -   |
| <i>C. brenneri CBN05184</i>        | R                                          | R   | H   | H   | R   |
| <i>C. brenneri Cbn-aakg-2</i>      | R                                          | H   | R   | H   | R   |
| <i>C. brenneri Cbn-aakg-3</i>      | R                                          | H   | R   | H   | R   |
| <i>C. brenneri Cbn-aakg-4</i>      | I                                          | S   | F   | S   | S   |
| <i>C. brenneri CBN19031</i>        | T                                          | H   | R   | Q   | S   |
| <i>C. japonica CJA14721a</i>       | R                                          | H   | R   | H   | R   |
| <i>C. japonica Cjp-aakg-2</i>      | R                                          | H   | R   | H   | R   |
| <i>C. japonica Cjp-aakg-3</i>      | -                                          | -   | -   | H   | R   |
| <i>C. japonica Cjp aakg-4</i>      | I                                          | S   | F   | N   | C   |
| <i>C. japonica CJA32986b</i>       | R                                          | -   | -   | -   | -   |
| <i>P. pacificus 1</i>              | R                                          | H   | R   | -   | -   |
| <i>P. pacificus 2</i>              | R                                          | H   | R   | H   | R   |
| <i>P. pacificus 3</i>              | R                                          | H   | R   | Y   | R   |
| <i>P. pacificus 4</i>              | S                                          | H   | R   | -   | -   |
| <i>P. pacificus 5</i>              | G                                          | -   | -   | -   | -   |
| <i>H. contortus 00980100.t1 1</i>  | R                                          | H   | R   | H   | R   |
| <i>H. contortus 02057000.t2 1</i>  | R                                          | H   | R   | H   | R   |
| <i>H. contortus 00002900.t1 1</i>  | R                                          | H   | R   | Q   | R   |
| <i>H. contortus 01835300.t1 1</i>  | R                                          | H   | R   | M   | R   |
| <i>H. contortus 00949100.t3 1</i>  | Q                                          | H   | R   | -   | -   |

**Table S2. AMP/ATP binding residues in Rhabditida.**
