# Supplementary material for: DAF-16/FoxO Directly Regulates an Atypical AMP-Activated Protein Kinase Gamma Isoform to Mediate the Effects of Insulin/IGF-1 Signaling on Aging in Caenorhabditis elegans
Source: PubMed Central journal article supplement (PMC3916255; doi:10.1371/journal.pgen.1004109), 2014-02-06
Supplement: pgen.1004109.s019.pdf [file pgen.1004109.s019.pdf]

| Species and gene                         | Residue<br>(Human <i>PRKAG1</i> numbering) |     |     |     |     |
|------------------------------------------|--------------------------------------------|-----|-----|-----|-----|
|                                          | 70                                         | 150 | 151 | 298 | 299 |
| <i>T. spiralis</i> 003373079.1           | R                                          | H   | R   | H   | R   |
| <i>T. spiralis</i> 003373447.1           | L                                          | H   | R   | H   | R   |
| <i>T. muris</i> 1                        | R                                          | H   | R   | -   | -   |
| <i>T. muris</i> 2                        | -                                          | -   | -   | H   | R   |
| <i>G. pallida</i> 001103800              | R                                          | H   | R   | S   | E   |
| <i>H. microstoma</i> _000072800.1        | R                                          | H   | R   | H   | R   |
| <i>H. microstoma</i> _000177500.1        | S                                          | T   | T   | S   | C   |
| <i>H. microstoma</i> _000994900.1        | R                                          | H   | R   | H   | R   |
| <i>O. volvulus</i> _665_aa_scaffold2.1   | R                                          | H   | R   | H   | R   |
| <i>O. volvulus</i> _272_aa_scaffold146.1 | -                                          | H   | R   | H   | R   |
| <i>B. malayi</i> 1                       | R                                          | H   | R   | H   | R   |
| <i>B. malayi</i> 2                       | -                                          | -   | -   | H   | R   |
| <i>B. malayi</i> 4                       | E                                          | H   | R   | D   | Q   |
| <i>B. malayi</i> 5                       | -                                          | -   | -   | -   | -   |
| <i>S. ratti</i> 321 020524600.t1         | R                                          | -   | -   | H   | R   |
| <i>S. ratti</i> 321 020553100.t1         | Q                                          | K   | R   | N   | A   |
| <i>B. xylophilus</i> s00333.119.1        | R                                          | H   | R   | H   | R   |
| <i>B. xylophilus</i> s00579.530.1        | R                                          | H   | R   | S   | Q   |
| <i>S. japonicum</i> _0031410.1           | -                                          | H   | R   | -   | -   |
| <i>S. japonicum</i> _0023410.1           | R                                          | H   | R   | -   | -   |
| <i>S. japonicum</i> _0030130.1           | R                                          | -   | -   | -   | -   |
| <i>S. mansoni</i> 127420.1               | R                                          | H   | H   | R   | S   |
| <i>S. mansoni</i> 142030.1               | -                                          | -   | -   | H   | R   |
| <i>S. mansoni</i> 144700.1               | M                                          | P   | Y   | S   | A   |
| <i>E. multilocularis</i> _001024900.1    | R                                          | H   | R   | H   | R   |
| <i>E. multilocularis</i> _001057300.1    | R                                          | H   | R   | H   | R   |
| <i>E. granulosus</i> _001024900.1        | R                                          | H   | R   | H   | R   |
| <i>E. granulosus</i> _001057300.1        | R                                          | H   | R   | H   | R   |
| <i>T. solium</i> _000191400.1            | R                                          | H   | R   | H   | R   |
| <i>T. solium</i> _000222200.1            | R                                          | H   | R   | -   | -   |

Nematoda

Platyhelminthes

**Table S3. AMP/ATP binding residues in Nematoda and Platyhelminthes.**
