# Supplementary material for: DAF-16/FoxO Directly Regulates an Atypical AMP-Activated Protein Kinase Gamma Isoform to Mediate the Effects of Insulin/IGF-1 Signaling on Aging in Caenorhabditis elegans
Source: PubMed Central journal article supplement (PMC3916255; doi:10.1371/journal.pgen.1004109), 2014-02-06
Supplement: pgen.1004109.s020.pdf [file pgen.1004109.s020.pdf]

| <b>Study</b>                                                                 | <b>Comparison</b>                                                               | <b>daf-16</b>           | <b>p</b>                 | <b>aak-2</b> | <b>p</b>    | <b>aakb-1</b> | <b>p</b>                 | <b>aakg-4</b> | <b>p</b>                 | <b>aakg-5</b> | <b>p</b>                 |
|------------------------------------------------------------------------------|---------------------------------------------------------------------------------|-------------------------|--------------------------|--------------|-------------|---------------|--------------------------|---------------|--------------------------|---------------|--------------------------|
| McElwee <i>et al.</i> , 2003<br>(reanalyzed by McElwee <i>et al.</i> , 2007) | <i>glp-4(bn2); daf-2(e1370)</i> vs <i>daf-16(m27); glp-4(bn2); daf-2(e1370)</i> | <b>1.84</b>             | <b>SD</b><br><b>0.20</b> | 1.06         | SD<br>0.23  | <b>2.14</b>   | <b>SD</b><br><b>1.70</b> | <b>6.72</b>   | <b>SD</b><br><b>0.24</b> | <b>6.06</b>   | <b>SD</b><br><b>1.35</b> |
| McElwee <i>et al.</i> , 2004                                                 | <i>daf-2(e1370)</i> vs <i>daf-16(mgDf50); daf-2(e1370)</i>                      |                         |                          | <b>1.84</b>  | <b>0.12</b> | <b>3.68</b>   | <b>0.02</b>              | <b>8.40</b>   | <b>0.00</b>              | <b>2.79</b>   | <b>0.09</b>              |
| McElwee <i>et al.</i> , 2004                                                 | <i>daf-2(m577)</i> vs <i>daf-16(mgDf50); daf-2(m577)</i>                        |                         |                          | <b>2.28</b>  | <b>0.00</b> | <b>7.51</b>   | <b>0.00</b>              | <b>6.63</b>   | <b>0.00</b>              | <b>3.53</b>   | <b>0.00</b>              |
|                                                                              |                                                                                 |                         |                          |              |             |               |                          |               |                          |               |                          |
| Budovskaya <i>et al.</i> , 2008                                              | <i>fer-15(b26); daf-16(m26)</i> vs <i>fer-15(b26)</i>                           | <b>-0.942</b><br>-0.171 | <b>0</b><br>0.19         | 0.02         | 0.94        | <b>-0.50</b>  | <b>0</b>                 | <b>-0.47</b>  | <b>0.00</b>              | -0.02         | 0.95                     |
| Golden and Melov 2004                                                        | <i>daf-2(e1370)</i> vs N2 (single worms at 19 days)                             |                         |                          |              |             | <b>0.63</b>   | <b>0.00</b>              |               |                          |               |                          |
| Troemel <i>et al.</i> , 2006                                                 | <i>daf-2(e1370)</i> vs <i>daf-16(mgDf50); daf-2(e1370)</i>                      |                         |                          | -0.283       | 0.46        | 0.153         | 0.75                     | 0.496         | 0.09                     | -0.160        | 0.49                     |
| qRT-PCR (This study)                                                         | N2 vs <i>daf-2(e1370)</i>                                                       |                         |                          | +2.52        | 0.30        | +3.00         | 0.08                     | <b>+5.26</b>  | <b>0.01</b>              | +1.49         | 0.39                     |
|                                                                              | <i>daf-2(e1370)</i> vs <i>daf-16(mgDf50); daf-2(e1370)</i>                      |                         |                          | -1.58        | 0.50        | -3.03         | 0.08                     | <b>-9.15</b>  | <b>0.01</b>              | -0.92         | 0.87                     |

**Table S4. Effects of insulin/IGF-1 signaling on AMPK gene expression.**
