# Supplementary material for: DAF-16/FoxO Directly Regulates an Atypical AMP-Activated Protein Kinase Gamma Isoform to Mediate the Effects of Insulin/IGF-1 Signaling on Aging in Caenorhabditis elegans
Source: PubMed Central journal article supplement (PMC3916255; doi:10.1371/journal.pgen.1004109), 2014-02-06
Supplement: pgen.1004109.s021.pdf [file pgen.1004109.s021.pdf]

| Gene           | DamID peak | % input <i>daf-2(e1370)</i> compared to % input <i>daf-16(mgDf50);daf-2</i><br><i>p</i> value (ttest) |         |         | % input <i>daf-2(e1370)</i> compared to % input <i>daf-16;daf-2</i><br><i>p</i> value (MELM) |
|----------------|------------|-------------------------------------------------------------------------------------------------------|---------|---------|----------------------------------------------------------------------------------------------|
|                |            | Trial 1                                                                                               | Trial 2 | Trial 3 |                                                                                              |
| <i>aakg-4</i>  | 1          | NS (0.06)                                                                                             | 0.04    | NS      | NS (0.08)                                                                                    |
| <i>aakg-4</i>  | 2          | 0.02                                                                                                  | 0.005   | NS      | 0.01                                                                                         |
| <i>aakg-5</i>  | 1          | NS                                                                                                    | 0.01    | NS      | NS (0.07)                                                                                    |
| <i>M01H9.3</i> |            | <0.001                                                                                                | 0.02    | 0.003   | <0.0001                                                                                      |

**Table S5. Statistical analysis of ChIP data.**
