# Supplementary material for: DAF-16/FoxO Directly Regulates an Atypical AMP-Activated Protein Kinase Gamma Isoform to Mediate the Effects of Insulin/IGF-1 Signaling on Aging in Caenorhabditis elegans
Source: PubMed Central journal article supplement (PMC3916255; doi:10.1371/journal.pgen.1004109), 2014-02-06
Supplement: pgen.1004109.s022.pdf [file pgen.1004109.s022.pdf]

| Strain | Genotype              | Trial | Mean lifespan<br>± SEM (days) | %<br>Difference    | N (total) | <i>p</i>                                    |
|--------|-----------------------|-------|-------------------------------|--------------------|-----------|---------------------------------------------|
|        | N2                    | C     | 14.3 ± 0.14                   |                    | 379 (384) |                                             |
| GA1061 | <i>aakb-1(tm2658)</i> | C     | 12.6 ± 0.15                   | -13.00             | 283 (291) | <0.0001 <sup>a</sup>                        |
| DR1567 | <i>daf-2(m577)</i>    | C     | 29.1 ± 0.37                   |                    | 324 (351) |                                             |
| GA1069 | <i>aakb-1; daf-2</i>  | C     | 25.5 ± 0.32                   | -14.17             | 325 (403) | <0.0001 <sup>a/b</sup>                      |
|        |                       |       |                               |                    |           |                                             |
|        | N2                    | 1     | 14.2 ± 0.25                   |                    | 82 (84)   |                                             |
| GA1061 | <i>aakb-1(tm2658)</i> | 1     | 12.5 ± 0.23                   | -12.0 <sup>a</sup> | 94 (99)   | <0.0001 <sup>a</sup>                        |
| DR1567 | <i>daf-2(m577)</i>    | 1     | 31.2 ± 0.84                   |                    | 59 (76)   | <0.0001 <sup>a</sup>                        |
| GA1069 | <i>aakb-1; daf-2</i>  | 1     | 24.2 ± 0.54                   | -22.0 <sup>b</sup> | 78 (80)   | <0.0001 <sup>a/b</sup>                      |
|        |                       |       |                               |                    |           |                                             |
|        | N2                    | 2     | 13.5 ± 0.28                   |                    | 97 (100)  |                                             |
| GA1061 | <i>aakb-1</i>         | 2     | 13.1 ± 0.29                   | -3 <sup>a</sup>    | 72 (75)   | NS <sup>a</sup>                             |
| DR1567 | <i>daf-2</i>          | 2     | 29.8 ± 0.97                   |                    | 51 (52)   | <0.0001 <sup>a</sup>                        |
| GA1069 | <i>aakb-1; daf-2</i>  | 2     | 27.2 ± 0.59                   | -8.6 <sup>b</sup>  | 61 (71)   | <0.0001 <sup>a/b</sup>                      |
|        |                       |       |                               |                    |           |                                             |
|        | N2                    | 3     | 14.4 ± 0.30                   |                    | 100 (100) |                                             |
| GA1061 | <i>aakb-1</i>         | 3     | 12.6 ± 0.37                   | -12.0 <sup>a</sup> | 50 (50)   | 0.0002 <sup>a</sup>                         |
| DR1567 | <i>daf-2</i>          | 3     | 28.7 ± 0.65                   |                    | 116 (122) | <0.0001 <sup>a</sup>                        |
| GA1069 | <i>aakb-1; daf-2</i>  | 3     | 25.9 ± 0.70                   | -9.5 <sup>b</sup>  | 97 (126)  | <0.0001 <sup>a</sup><br>0.0036 <sup>b</sup> |
|        |                       |       |                               |                    |           |                                             |
|        | N2                    | 4     | 15.1 ± 0.24                   |                    | 100 (100) |                                             |
| GA1061 | <i>aakb-1</i>         | 4     | 12.5 ± 0.36                   | -17.2 <sup>a</sup> | 66 (67)   | <0.0001 <sup>a</sup>                        |
| DR1567 | <i>daf-2</i>          | 4     | 28.0 ± 0.61                   |                    | 98 (101)  | <0.0001 <sup>a</sup>                        |
| GA1069 | <i>aakb-1; daf-2</i>  | 4     | 25.2 ± 0.61                   | -10.0 <sup>b</sup> | 88 (126)  | <0.0001 <sup>a</sup><br>0.0004 <sup>b</sup> |

**Table S6. Effects of *aakb-1(tm2658)* on lifespan.**
