# Supplementary material for: DAF-16/FoxO Directly Regulates an Atypical AMP-Activated Protein Kinase Gamma Isoform to Mediate the Effects of Insulin/IGF-1 Signaling on Aging in Caenorhabditis elegans
Source: PubMed Central journal article supplement (PMC3916255; doi:10.1371/journal.pgen.1004109), 2014-02-06
Supplement: pgen.1004109.s023.pdf [file pgen.1004109.s023.pdf]

| Strain | Genotype                          | Trial | Mean lifespan<br>± SEM (Days) | % Difference | N (total) | p                                           |
|--------|-----------------------------------|-------|-------------------------------|--------------|-----------|---------------------------------------------|
|        | N2                                | 1     | 11.1 ± 0.17                   |              | 127 (127) | <0.0001 <sup>a</sup>                        |
| GA1071 | <i>aakg-4(tm5539)</i>             | 1     | 11.2 ± 0.14                   |              | 110 (123) | <0.0001 <sup>a</sup><br>NS <sup>b</sup>     |
| DR1567 | <i>daf-2(m577)</i>                | 1     | 29.5 ± 0.59                   |              | 115 (116) | -                                           |
| GA1072 | <i>daf-2(m577);aakg-4(tm5539)</i> | 1     | 23.9 ± 0.48                   | -23.06       | 123 (123) | <0.0001 <sup>a</sup>                        |
| GA1001 | <i>aak-2(ok524)</i>               | 1     | 9.7 ± 0.12                    |              | 125 (125) | <0.0001 <sup>c</sup>                        |
|        |                                   |       |                               |              |           |                                             |
|        | N2                                | 2     | 11.8 ± 0.18                   |              | 121 (125) | <0.0001 <sup>a</sup>                        |
| GA1071 | <i>aakg-4(tm5539)</i>             | 2     | 12.4 ± 0.23                   |              | 102 (123) | <0.0001 <sup>a</sup><br>0.0266 <sup>b</sup> |
| DR1567 | <i>daf-2(m577)</i>                | 2     | 28.9 ± 0.45                   |              | 95 (97)   | -                                           |
| GA1072 | <i>daf-2(m577);aakg-4(tm5539)</i> | 2     | 24.0 ± 0.41                   | -20.33       | 106 (110) | <0.0001 <sup>a</sup>                        |
| GA1001 | <i>aak-2(ok524)</i>               | 2     | 9.3 ± 0.14                    |              | 121 (121) | <0.0001 <sup>c</sup>                        |
|        |                                   |       |                               |              |           |                                             |
|        | N2                                | 3     | 11.7 ± 0.13                   |              | 118 (120) | <0.0001 <sup>a</sup>                        |
| DR1567 | <i>daf-2(m577)</i>                | 3     | 29.9 ± 0.50                   |              | 110 (110) | -                                           |
| GA1072 | <i>daf-2(m577);aakg-4(tm5539)</i> | 3     | 23.7 ± 0.36                   | -26.33       | 187 (187) | <0.0001 <sup>a</sup>                        |
|        |                                   |       |                               |              |           |                                             |
|        | N2                                | 4     | 11.3 ± 0.17                   |              | 127 (127) | <0.0001 <sup>a</sup>                        |
| DR1567 | <i>daf-2(m577)</i>                | 4     | 29.0 ± 0.69                   |              | 121 (124) | -                                           |
| GA1072 | <i>daf-2(m577);aakg-4(tm5539)</i> | 4     | 22.7 ± 0.36                   | -27.85       | 241 (241) | <0.0001 <sup>a</sup>                        |

**Table S7. *aakg-4(tm5539)* shortens *daf-2* lifespan.**
