# Supplementary material for: DAF-16/FoxO Directly Regulates an Atypical AMP-Activated Protein Kinase Gamma Isoform to Mediate the Effects of Insulin/IGF-1 Signaling on Aging in Caenorhabditis elegans
Source: PubMed Central journal article supplement (PMC3916255; doi:10.1371/journal.pgen.1004109), 2014-02-06
Supplement: pgen.1004109.s024.pdf [file pgen.1004109.s024.pdf]

| Strain | Genotype and RNAi treatment              | Trial | Mean lifespan ± SEM (days) | % Difference        | N (total) | <i>p</i>                                    |
|--------|------------------------------------------|-------|----------------------------|---------------------|-----------|---------------------------------------------|
| GA303  | <i>rrf-3</i> ; <i>daf-2</i> control RNAi | 1     | 29.2 ± 0.98                |                     | 73 (98)   | -                                           |
| GA303  | <i>rrf-3</i> ; <i>daf-2 aakg-4</i> RNAi  | 1     | 28.0 ± 0.72                | -3.8 <sup>b</sup>   | 78 (96)   | 0.047 <sup>a</sup>                          |
| GA303  | <i>rrf-3</i> ; <i>daf-2 aakg-5</i> RNAi  | 1     | 27.5 ± 1.08                | -5.6 <sup>b</sup>   | 56 (82)   | NS <sup>a</sup>                             |
| NL2099 | <i>rrf-3</i> control RNAi                | 2     | 14.8 ± 0.52                |                     | 86 (99)   |                                             |
| GA303  | <i>rrf-3</i> ; <i>daf-2</i> control RNAi | 2     | 28.4 ± 1.08                |                     | 86 (88)   | <0.0001 <sup>b</sup>                        |
| GA303  | <i>rrf-3</i> ; <i>daf-2 aakg-4</i> RNAi  | 2     | 23.2 ± 0.79                | -18.4 <sup>b</sup>  | 109 (109) | <0.0001 <sup>a</sup>                        |
| GA303  | <i>rrf-3</i> ; <i>daf-2 aakg-5</i> RNAi  | 2     | 25.9 ± 0.99                | -9.0 <sup>b</sup>   | 108 (108) | 0.07 <sup>a</sup>                           |
| NL2099 | <i>rrf-3</i> control RNAi                | 3     | 13.7 ± 0.47                |                     | 82 (82)   | -                                           |
| GA303  | <i>rrf-3</i> ; <i>daf-2</i> control RNAi | 3     | 26.5 ± 0.83                |                     | 106 (118) | <0.0001 <sup>b</sup>                        |
| GA303  | <i>rrf-3</i> ; <i>daf-2 aakg-4</i> RNAi  | 3     | 22.9 ± 0.70                | -13.7 <sup>b</sup>  | 108 (108) | <0.0001 <sup>a</sup>                        |
| GA303  | <i>rrf-3</i> ; <i>daf-2 aakg-5</i> RNAi  | 3     | 26.0 ± 1.10                | -2.1 <sup>b</sup>   | 81 (81)   | NS <sup>a</sup>                             |
| NL2099 | <i>rrf-3</i> control RNAi                | 4     | 12.6 ± 0.34                |                     | 119 (123) | -                                           |
| NL2099 | <i>rrf-3 aakg-4</i> RNAi                 | 4     | 11.8 ± 0.35                | -6.5 <sup>a</sup>   | 79 (81)   | 0.08 <sup>b</sup>                           |
| GA303  | <i>rrf-3</i> ; <i>daf-2</i> control RNAi | 4     | 26.6 ± 0.86                |                     | 127 (127) | <0.0001 <sup>b</sup>                        |
| GA303  | <i>rrf-3</i> ; <i>daf-2 aakg-4</i> RNAi  | 4     | 20.0 ± 0.72                | -24.8 <sup>b</sup>  | 102 (102) | <0.0001 <sup>a/b</sup>                      |
| GA303  | <i>rrf-3</i> ; <i>daf-2 aakg-5</i> RNAi  | 4     | 17.8 ± 0.72                | -32.9 <sup>b</sup>  | 114 (114) | <0.0001 <sup>a/b</sup>                      |
| NL2099 | <i>rrf-3</i> control RNAi                | 5     | 11.6 ± 0.39                |                     | 49 (50)   | -                                           |
| NL2099 | <i>rrf-3 aakg-4</i> RNAi                 | 5     | 10.8 ± 0.36                | -6.9 <sup>a</sup>   | 49 (50)   | NS <sup>b</sup>                             |
| NL2099 | <i>rrf-3 aakg-5</i> RNAi                 | 5     | 10.9 ± 0.39                | -5.9 <sup>a</sup>   | 50 (50)   | NS <sup>b</sup>                             |
| GA303  | <i>rrf-3</i> ; <i>daf-2</i> control RNAi | 5     | 27.9 ± 1.01                |                     | 43 (50)   | <0.0001 <sup>b</sup>                        |
| GA303  | <i>rrf-3</i> ; <i>daf-2 aakg-4</i> RNAi  | 5     | 22.9 ± 0.53                | -18.0 <sup>b</sup>  | 47 (50)   | <0.0001 <sup>a/b</sup>                      |
| GA303  | <i>rrf-3</i> ; <i>daf-2 aakg-5</i> RNAi  | 5     | 29.0 ± 0.72                | +4.0 <sup>b</sup>   | 47 (50)   | NS <sup>a</sup><br><0.0001 <sup>b</sup>     |
| NL2099 | <i>rrf-3</i> control RNAi                | 6     | 9.2 ± 0.27                 |                     | 75(75)    | -                                           |
| NL2099 | <i>rrf-3 aakg-4</i> RNAi                 | 6     | 10.3 ± 0.26                | +11.8 <sup>a</sup>  | 73 (75)   | 0.005 <sup>a</sup>                          |
| GA303  | <i>rrf-3</i> ; <i>daf-2</i> control RNAi | 6     | 27.1 ± 0.47                |                     | 56 (60)   | <0.0001 <sup>a</sup>                        |
| GA303  | <i>rrf-3</i> ; <i>daf-2 aakg-4</i> RNAi  | 6     | 24.1 ± 0.52                | -10.8 <sup>b</sup>  | 73 (75)   | <0.0001 <sup>a</sup><br>0.0002 <sup>b</sup> |
| NL2099 | <i>rrf-3</i> control RNAi                | 7     | 12.1 ± 0.33                |                     | 67 (67)   | -                                           |
| NL2099 | <i>rrf-3 aakg-4</i> RNAi                 | 7     | 11.0 ± 0.31                | -8.9 <sup>a</sup>   | 66 (68)   | 0.02 <sup>b</sup>                           |
| NL2099 | <i>rrf-3 aakg-5</i> RNAi                 | 7     | 12.0 ± 0.40                | -0.8 <sup>a</sup>   | 65 (67)   | NS <sup>b</sup>                             |
|        | N2 control RNAi                          | 8     | 9.7 ± 0.25                 |                     | 96 (99)   |                                             |
|        | N2 <i>aakg-4</i> RNAi                    | 8     | 10.2 ± 0.22                | +5.22 <sup>a</sup>  | 116 (122) | 0.1370 <sup>a</sup>                         |
|        | N2 <i>aakg-5</i> RNAi                    | 8     | 10.7 ± 0.27                | +10.61 <sup>a</sup> | 98 (99)   | 0.0045 <sup>a</sup>                         |
| GA1071 | <i>aakg-4</i> control RNAi               | 8     | 10.8 ± 0.26                |                     | 96 (99)   | 0.0027 <sup>a</sup>                         |
| GA1071 | <i>aakg-4</i> ; <i>aakg-5</i> RNAi       | 8     | 12.2 ± 0.21                | +12.37 <sup>c</sup> | 97 (97)   | 0.0005 <sup>c</sup>                         |
| DR1567 | <i>daf-2</i> control RNAi                | 8     | 21.5 ± 0.79                |                     | 80 (85)   | <0.0001 <sup>a</sup>                        |
| DR1567 | <i>daf-2 aakg-4</i> RNAi                 | 8     | 19.7 ± 0.69                | -8.43 <sup>b</sup>  | 106 (111) | 0.0013 <sup>b</sup>                         |

|        |                                   |    |             |                     |           |                      |
|--------|-----------------------------------|----|-------------|---------------------|-----------|----------------------|
| DR1567 | <i>daf-2 aakg-5</i> RNAi          | 8  | 16.9 ± 0.69 | -21.24 <sup>b</sup> | 55 (67)   | <0.0001 <sup>b</sup> |
|        |                                   |    |             |                     |           |                      |
|        | N2 control RNAi                   | 9  | 9.9 ± 0.29  |                     | 100 (100) |                      |
|        | N2 <i>aakg-4</i> RNAi             | 9  | 9.9 ± 0.34  | +0.68 <sup>a</sup>  | 64 (64)   | NS <sup>a</sup>      |
|        | N2 <i>aakg-5</i> RNAi             | 9  | 10.0 ± 0.31 | +1.72 <sup>a</sup>  | 100 (100) | NS <sup>a</sup>      |
| GA1071 | <i>aakg-4</i> control RNAi        | 9  | 10.4 ± 0.26 |                     | 98 (99)   | NS <sup>a</sup>      |
| GA1071 | <i>aakg-4; aakg-5</i> RNAi        | 9  | 10.6 ± 0.29 | +2.46 <sup>c</sup>  | 100 (100) | NS <sup>c</sup>      |
| DR1567 | <i>daf-2</i> control RNAi         | 9  | 23.8 ± 0.71 |                     | 85 (87)   | <0.0001 <sup>a</sup> |
| DR1567 | <i>daf-2 aakg-4</i> RNAi          | 9  | 20.0 ± 0.57 | -15.72 <sup>b</sup> | 95 (95)   | <0.0001 <sup>b</sup> |
| DR1567 | <i>daf-2 aakg-5</i> RNAi          | 9  | 20.2 ± 0.74 | -14.92 <sup>b</sup> | 90 (90)   | 0.0028 <sup>b</sup>  |
| GA1072 | <i>daf-2; aakg-4</i> control RNAi | 9  | 18.2 ± 1.00 |                     | 38 (38)   | <0.0001 <sup>b</sup> |
| GA1072 | <i>daf-2; aakg-4 aakg-5</i> RNAi  | 9  | 19.7 ± 0.74 | +7.95 <sup>d</sup>  | 80 (80)   | NS <sup>d</sup>      |
|        |                                   |    |             |                     |           |                      |
| DR1567 | <i>daf-2</i> control RNAi         | 10 | 24.1 ± 0.73 |                     | 105 (115) | -                    |
| DR1567 | <i>daf-2 aakg-5</i> RNAi          | 10 | 18.5 ± 0.75 | -23.40 <sup>b</sup> | 99 (101)  | <0.0001 <sup>b</sup> |
| GA1072 | <i>daf-2; aakg-4</i> control RNAi | 10 | 18.9 ± 0.73 | -21.65 <sup>b</sup> | 71 (71)   | <0.0001 <sup>b</sup> |
| GA1072 | <i>daf-2; aakg-4 aakg-5</i> RNAi  | 10 | 19.5 ± 0.67 | +3.23 <sup>d</sup>  | 86 (95)   | NS <sup>d</sup>      |

**Table S8. *aakg-4* and *aakg-5* RNAi shorten *daf-2* lifespan.**
