# Supplementary material for: DAF-16/FoxO Directly Regulates an Atypical AMP-Activated Protein Kinase Gamma Isoform to Mediate the Effects of Insulin/IGF-1 Signaling on Aging in Caenorhabditis elegans
Source: PubMed Central journal article supplement (PMC3916255; doi:10.1371/journal.pgen.1004109), 2014-02-06
Supplement: pgen.1004109.s025.pdf [file pgen.1004109.s025.pdf]

| Strain | Genotype and RNAi treatment              | Trial | Mean lifespan $\pm$ SEM (days) | % Differences | N (total) | <i>p</i>             |
|--------|------------------------------------------|-------|--------------------------------|---------------|-----------|----------------------|
| GA303  | <i>rrf-3</i> ; <i>daf-2</i> control RNAi | 1     | 29.2 $\pm$ 0.98                |               | 73 (98)   | -                    |
| GA303  | <i>rrf-3</i> ; <i>daf-2 aakg-1</i> RNAi  | 1     | 26.0 $\pm$ 0.71                | -31           | 74 (84)   | <0.0001 <sup>a</sup> |
| GA303  | <i>rrf-3</i> ; <i>daf-2 aakg-2</i> RNAi  | 1     | 30.4 $\pm$ 1.21                | +4.2          | 35 (43)   | NS <sup>a</sup>      |
| GA303  | <i>rrf-3</i> ; <i>daf-2 aakg-3</i> RNAi  | 1     | 28.2 $\pm$ 1.11                | -3.4          | 35 (43)   | NS <sup>a</sup>      |
|        |                                          |       |                                |               |           |                      |
| NL2099 | <i>rrf-3</i> control RNAi                | 2     | 14.8 $\pm$ 0.52                |               | 86 (99)   | -                    |
| GA303  | <i>rrf-3</i> ; <i>daf-2</i> control RNAi | 2     | 28.4 $\pm$ 1.08                |               | 86 (88)   | <0.0001 <sup>b</sup> |
| GA303  | <i>rrf-3</i> ; <i>daf-2 aakg-1</i> RNAi  | 2     | 28.7 $\pm$ 0.79                | +0.8          | 103 (116) | NS <sup>a</sup>      |
| GA303  | <i>rrf-3</i> ; <i>daf-2 aakg-2</i> RNAi  | 2     | 29.2 $\pm$ 1.07                | +2.6          | 75 (83)   | NS <sup>a</sup>      |
| GA303  | <i>rrf-3</i> ; <i>daf-2 aakg-3</i> RNAi  | 2     | 32.3 $\pm$ 0.65                | +13.8         | 104 (104) | NS <sup>a</sup>      |
|        |                                          |       |                                |               |           |                      |
| NL2099 | <i>rrf-3</i> control RNAi                | 3     | 13.7 $\pm$ 0.47                |               | 82 (82)   | -                    |
| GA303  | <i>rrf-3</i> ; <i>daf-2</i> control RNAi | 3     | 26.5 $\pm$ 0.83                |               | 106 (118) | <0.0001 <sup>b</sup> |
| GA303  | <i>rrf-3</i> ; <i>daf-2 aakg-1</i> RNAi  | 3     | 24.9 $\pm$ 0.79                | -6.2          | 129 (129) | NS <sup>a</sup>      |
| GA303  | <i>rrf-3</i> ; <i>daf-2 aakg-2</i> RNAi  | 3     | 26.0 $\pm$ 0.90                | -1.9          | 98 (98)   | NS <sup>a</sup>      |
| GA303  | <i>rrf-3</i> ; <i>daf-2 aakg-3</i> RNAi  | 3     | 31.3 $\pm$ 0.61                | +18.1         | 125 (125) | <0.0001 <sup>a</sup> |
|        |                                          |       |                                |               |           |                      |
| NL2099 | <i>rrf-3</i> control RNAi                | 4     | 12.6 $\pm$ 0.34                |               | 119 (123) | -                    |
| GA303  | <i>rrf-3</i> ; <i>daf-2</i> control RNAi | 4     | 26.6 $\pm$ 0.86                |               | 127 (127) | <0.0001 <sup>b</sup> |
| GA303  | <i>rrf-3</i> ; <i>daf-2 aakg-1</i> RNAi  | 4     | 23.4 $\pm$ 1.09                | -11.9         | 70 (71)   | 0.005 <sup>a</sup>   |
| GA303  | <i>rrf-3</i> ; <i>daf-2 aakg-2</i> RNAi  | 4     | 25.9 $\pm$ 0.92                | -2.5          | 109 (109) | NS                   |
| GA303  | <i>rrf-3</i> ; <i>daf-2 aakg-3</i> RNAi  | 4     | 24.8 $\pm$ 0.91                | -6.8          | 85 (86)   | NS                   |

**Table S9. RNAi targeted to *aakg-1*, *aakg-2* or *aakg-3* does not consistently suppress *daf-2* mutant longevity.**
