# Supplementary material for: DAF-16/FoxO Directly Regulates an Atypical AMP-Activated Protein Kinase Gamma Isoform to Mediate the Effects of Insulin/IGF-1 Signaling on Aging in Caenorhabditis elegans
Source: PubMed Central journal article supplement (PMC3916255; doi:10.1371/journal.pgen.1004109), 2014-02-06
Supplement: pgen.1004109.s026.pdf [file pgen.1004109.s026.pdf]

|                                | <b>Tissue</b>                    | <b>Paak-2::GFP</b>       | <b>Paakb-1::GFP</b> | <b>Paakg-4::GFP</b> | <b>Paakg-5::GFP</b> |   |
|--------------------------------|----------------------------------|--------------------------|---------------------|---------------------|---------------------|---|
| <b>Head</b>                    | Excretory cell                   | Y                        |                     |                     | Y                   |   |
|                                | Pharyngeal neurons               | Y                        | Y                   | Y                   | Y                   |   |
|                                | Pharyngeal epithelial cells      | Y                        |                     |                     | Y                   |   |
|                                | Pharyngeal support cells         |                          |                     |                     |                     |   |
|                                | Pharyngeal ring neurons          | Y                        | Y                   |                     | Y                   |   |
|                                | Sensory neurons termini          |                          |                     |                     | Y                   |   |
|                                | Pharynx muscles                  |                          | Y                   |                     |                     |   |
|                                | Pharyngeal intestinal valve      |                          | Y                   |                     |                     |   |
|                                | Ring ganglia                     |                          |                     | Y                   |                     |   |
|                                | Amphid sheath cells              |                          |                     | Y                   |                     |   |
|                                | Amphid socket cells              | Y                        |                     | Y                   |                     |   |
|                                | Amphid neurons                   |                          |                     | Y                   |                     |   |
|                                | Body wall muscles (head)         | Y                        |                     |                     |                     |   |
|                                | <b>Mid-body</b>                  | Body wall muscles (mid)  |                     | Y                   | Y                   |   |
| Intestine (mid)                |                                  | Y                        | Y                   | Y                   | Y                   |   |
| Vulva muscles                  |                                  | Y                        | Y                   | Y                   |                     |   |
| Uterine muscles                |                                  |                          | Y                   | Y                   |                     |   |
| Vulva epithelium               |                                  |                          |                     |                     | Y                   |   |
| Vulva neurons                  |                                  |                          |                     |                     | Y                   |   |
| Ventral cord processes/neurons |                                  |                          |                     | Y                   | Y                   |   |
| Spermatheca                    |                                  |                          |                     |                     | Y                   |   |
| Epthelial seam cells           |                                  |                          |                     |                     | Y                   |   |
| Female gonad sheath cells      |                                  |                          |                     |                     | Y                   |   |
| <b>Tail</b>                    |                                  | Body wall muscles (tail) |                     | Y                   | Y                   |   |
|                                |                                  | Intestine (posterior)    | Y                   | Y                   | Y                   | Y |
|                                | Phasmid sheath cells             | Y                        |                     | Y                   | Y                   |   |
|                                | Phasmid socket cells             | Y                        |                     | Y                   | Y                   |   |
|                                | Phasmid neurons                  | Y                        |                     | Y                   |                     |   |
|                                | Dorsal cord neuronal processes   |                          |                     | Y                   |                     |   |
|                                | Rectal epithelial cells          | Y                        |                     | Y                   | Y                   |   |
|                                | Anal-depressor muscle            |                          |                     | Y                   |                     |   |
|                                | Pre-anal ganglion rectal neurons |                          |                     | Y                   | Y                   |   |
|                                | Rectal gland                     | Y                        |                     |                     |                     |   |
|                                | Rectal intestinal valve          |                          | Y                   |                     | Y                   |   |
| Tail epithelia                 |                                  | Y                        |                     |                     |                     |   |

**Table S10. Expression pattern of AMPK subunits.**
